# Supplementary material for: In mice, discrete odors can selectively promote the neurogenesis of sensory neuron subtypes that they stimulate
Source: eLife. 2025 Jun 18;13:RP96152. doi: 10.7554/eLife.96152 (PMC12176391; doi:10.7554/eLife.96152)
Supplement: Figure 1—figure supplement 1—source data 1. [file elife-96152-fig1-figsupp1-data1.xlsx]

## Sheet: Fig 1 - S1
	Immature (Gap43+) OSNs of specific subtypes (mean % of all OSNs in OE1 and OE2 datasets)															Immature (Gap43+) OSNs of specific subtypes (mean % of all cells in OE1 and OE2 datasets)
	Olfr235			Olfr1440			Olfr1431			Olfr1434			Olfr1437			Olfr235			Olfr1440			Olfr1431			Olfr1434			Olfr1437
	open	closed		open	closed		open	closed		open	closed		open	closed		open	closed		open	closed		open	closed		open	closed		open	closed
OE 1	0.127146	0		0.190718	0		0	0		0.0635728	0		0.0635728	0.106045		0.0250313	0		0.0375469	0		0	0		0.0125156	0		0.0125156	0.0222173
OE 2	0.0414551	0.0241809		0.0829101	0.0483617		0.0103638	0		0.0414551	0		0.0103638	0.0241809		0.030532	0.0167799		0.061064	0.0335599		0.00763301	0		0.030532	0		0.00763301	0.0167799
mean	0.0843003	0.0120904		0.136814	0.0241809		0.00518188	0		0.0525139	0		0.0369683	0.0651127		0.0277817	0.00838997		0.0493055	0.0167799		0.0038165	0		0.0215238	0		0.0100743	0.0194986
