# Supplementary material for: In mice, discrete odors can selectively promote the neurogenesis of sensory neuron subtypes that they stimulate
Source: eLife. 2025 Jun 18;13:RP96152. doi: 10.7554/eLife.96152 (PMC12176391; doi:10.7554/eLife.96152)
Supplement: Figure 1—figure supplement 2—source data 1. [file elife-96152-fig1-figsupp2-data1.xlsx]

## Sheet: Fig1 - S2
Normalized counts of all OR transcripts within all cells containing Olfr235 transcripts																																			Normalized counts of all OR transcripts within all cells containing Olfr1440 transcripts
	OE 1 dataset								OE 2 dataset																											OE 1 dataset
	iOSNs			mOSNs					iOSNs							mOSNs																				INPs						iOSNs				mOSNs
	open			open					open				closed			open										closed										open				closed		open				open
OR gene	1	2		1	2	3		OR gene	1	2	3	4	1	2		1	2	3	4	5	6	7	8	9	10	1	2	3	4	5	6	7	8		OR gene	1	2	3	4	1		1	2	3		1	2	3	4
Olfr1018	1.29332	0		0	0	0		Olfr1209	0	0	0	0	0	0		0	0	0	0	0	0	0	0	0	0	1.2163	0	0	0	0	0	0	0		Olfr1082	0	0	0	0	1.70083		0	0	0		0	0	0	0
Olfr1095	1.29332	0		0	0	0		Olfr1256	0	0	0	0	0	0		2.22109	0	0	0	0	0	0	0	0	0	0	0	0	0	0	0	0	0		Olfr1137	0	0	0	1.37294	0		0	0	0		0	0	0	0
Olfr452	1.29332	0		0	0	0		Olfr1262	0	0	0	0	0	0		0	0	0	0	0	0	0	0	0	0	0	0	0	0	0	0	0	0.593606		Olfr1173	0	0	0	1.37294	0		0	0	0		0	0	0	0
Olfr718-ps1	1.29332	0		0	0	0		Olfr19	0	0	0	0	0	0		0	0	0	0	0	0	0	0	0	0	0	0	0	0	1.71355	0	0	0		Olfr1198	0	0.792761	0	0	0		0	0	0		0	0	0	0
Olfr235	23.2798	50.2443		43	53.9614	36.899		Olfr235	11.3256	4.81834	11.4883	10.2088	14.7822	11.8429		16.6582	8.38194	8.30556	11.9357	13.4442	22.054	19.2177	14.2095	7.78537	30.9683	7.29783	9	6.1866	12.7415	4.28388	9.25164	13.4178	18.9954		Olfr1217	0	0	0	1.37294	0		0	0	0		0	0	0	0
																																			Olfr1263	0.374159	0	0	0	0		0	0	0		0	0	0	0
																																			Olfr1283	0.374159	0	0	0	0		0	0	0		0	0	0	0
																																			Olfr1295	0	0.792761	0	0	0		0	0	0		0	0	0	0
																																			Olfr1353	0	0	0	0	0.242976		0	0	0		0	0	0	0
																																			Olfr1404	0.374159	0	0	0	0		0	0	0		0	0	0	0
																																			Olfr1471	0	0	0	0	0.728928		0	0	0		0	0	0	0
																																			Olfr1507	0	0	0	0	0		0	0	0		0	1.34655	0	0
																																			Olfr205	0	0	0	1.37294	0		0	0	0		0	0	0	0
																																			Olfr24	0.374159	0	0	0	0		0	0	0		0	0	0	0
																																			Olfr298	0	0	0	1.37294	0		0	0	0		0	0	0	0
																																			Olfr320	0	0	0	0	0		0	0	0.580536		0	0	0	0
																																			Olfr361	0	0	0	1.37294	0		0	0	0		0	0	0	0
																																			Olfr371	0	0	0.888628	0	0		0	0	0		0	0	0	0
																																			Olfr38	0	0	0.888628	0	0		0	0	0		0	0	0	0
																																			Olfr53	0	0	0	0	6.56035		0	0	0		0	0	0	0
																																			Olfr530	0.374159	0	0	0	0		0	0	0		0	0	0	0
																																			Olfr747	1.49664	0	0	0	0		0	0	0		0	0	0	0
																																			Olfr750	0	0	0	0	0		0	2.33553	0		0	0	0	0
																																			Olfr791	0.374159	0	0	0	0		0	0	0		0	0	0	0
																																			Olfr843	0	0	0	1.37294	0		0	0	0		0	0	0	0
																																			Olfr1440	0.374159	0.792761	0.888628	1.37294	2.91571		45.8337	15.1809	38.8959		78.1739	64.6342	74	63.0333
[truncated: 107 more columns]
