# Supplementary material for: In mice, discrete odors can selectively promote the neurogenesis of sensory neuron subtypes that they stimulate
Source: eLife. 2025 Jun 18;13:RP96152. doi: 10.7554/eLife.96152 (PMC12176391; doi:10.7554/eLife.96152)
Supplement: Figure 1—source data 1. [file elife-96152-fig1-data1.xlsx]

## Sheet: Fig 1
Immature (Gap43+) OSNs of specific subtypes (mean % of all OSNs in OE1 and OE2 datasets)
Musk-responsive subtypes				Random zone 2/3 OSN subtypes
	open	closed			open	closed
Olfr235	0.0843003	0.0120904		Olfr17	0.0317864	0.00604522
Olfr1440	0.136814	0.0241809		Olfr530	0.00518188	0.0590675
Olfr1431	0.00518188	0		Olfr686	0.0635728	0
Olfr1434	0.0525139	0		Olfr1395	0	0.0530223
Olfr1437	0.0369683	0.0651127		Olfr1402	0.0317864	0
				Olfr374	0.0317864	0
				Olfr211	0.047332	0.0530223
				Olfr398	0.0317864	0.0711579
				Olfr466	0.0317864	0
				Olfr449	0.0369683	0.0530223
				Olfr531	0.0953592	0.0530223
				Olfr1239	0.0421502	0.0711579
				Olfr1349	0.0317864	0.0590675
				Olfr1412	0.0317864	0.0530223
				Olfr701	0.0525139	0.0772031
mean	0.0631557	0.0202768		mean	0.0366478	0.037972
