# Supplementary material for: In mice, discrete odors can selectively promote the neurogenesis of sensory neuron subtypes that they stimulate
Source: eLife. 2025 Jun 18;13:RP96152. doi: 10.7554/eLife.96152 (PMC12176391; doi:10.7554/eLife.96152)
Supplement: Figure 2—figure supplement 1—source data 1. [file elife-96152-fig2-figsupp1-data1.xlsx]

## Sheet: Fig 2 - S1
UNO-treated ♂ ← ♂ mice, newborn (OR+/EdU+) OSNs per half-section
	Olfr1463
mouse #	Open	Closed
1	3	3.2
2	4.57143	3.57143
3	2.16667	2.66667
4	4.2	3.8
mean	3.48452	3.30952
SEM	0.552628	0.24739
non-normality test
Shapiro-Wilk (P value)	0.6298	0.7985
