# Supplementary material for: In mice, discrete odors can selectively promote the neurogenesis of sensory neuron subtypes that they stimulate
Source: eLife. 2025 Jun 18;13:RP96152. doi: 10.7554/eLife.96152 (PMC12176391; doi:10.7554/eLife.96152)
Supplement: Figure 2—figure supplement 2—source data 1. [file elife-96152-fig2-figsupp2-data1.xlsx]

## Sheet: Fig 2 - S2
	normalization methods for quantification of newborn Olfr235 (OR+/EdU+) OSNs in OEs of UNO-treated ♂ ← ♂ mice
	per half-section			per number of EdU+ cells			per unit DAPI+ area			UNO effect size [Open/Closed (Log2)]
mouse #	Open	Closed		Open	Closed		Open	Closed		1/2-section	EdU+ cells	DAPI+ area
1	1.66667	0.5		0.00157833	0.000736163		0.840324	0.379949		1.73697	1.1003	1.14514
2	0.9	0.3		0.000733887	0.000261902		0.349885	0.120676		1.58496	1.48653	1.53574
3	0.727273	0.272727		0.000485563	0.000207808		0.25808	0.0891014		1.41504	1.2244	1.5343
4	0.818182	0.636364		0.000782188	0.000604527		0.367873	0.267283		0.36257	0.371708	0.460841
5	2.1	1.2		0.00124668	0.000946704		0.833945	0.469947		0.807355	0.397104	0.827453
6	0.583333	0.25		0.000560464	0.000230396		0.310778	0.104854		1.22239	1.28251	1.5675
7	1.33333	0.333333		0.000998032	0.000312903		0.57151	0.156884		2	1.67337	1.86508
mean	1.16126	0.498918		0.000912163	0.000471486		0.504628	0.226956		1.30418	0.952076	1.15281
SEM	0.211265	0.128222		0.000147794	0.000110228		0.0934301	0.0565257		0.212846	0.191956	0.18574
