# Supplementary material for: In mice, discrete odors can selectively promote the neurogenesis of sensory neuron subtypes that they stimulate
Source: eLife. 2025 Jun 18;13:RP96152. doi: 10.7554/eLife.96152 (PMC12176391; doi:10.7554/eLife.96152)
Supplement: Figure 2—source data 1. [file elife-96152-fig2-data1.xlsx]

## Sheet: Fig 2
	UNO-treated ♂ ← ♂mice, newborn (OR+/EdU+) OSNs per half-section
	Olfr235			Olfr1440			Olfr1431			Olfr1437			Olfr912
mouse #	Open	Closed		Open	Closed		Open	Closed		Open	Closed		Open	Closed
1	1.66667	0.5		1.66667	0.444444		0.428571	0.285714		1.85714	0.857143		2	3
2	0.9	0.3		0.2	0.2		0.8	0.4		1	0.571429		3.25	3.5
3	0.727273	0.272727		0.636364	0.727273		0.714286	0.571429		1.2	2.2		1.4	0.8
4	0.818182	0.636364		1.08333	1.08333		1	0.2		0.8	1.2		3	1.85714
5	2.1	1.2		5	2.85714		0.5	0.5					2.83333	1.33333
6	0.583333	0.25		1.38462	1.23077		1.4	0.2					1.66667	2.16667
7	1.33333	0.333333		2.38462	1.23077		0.333333	0.166667					1.42857	1.28571
8				1.6	1.1		0.2	0.2					4	2.4
9				3.18182	0.909091		1.2	0.4					0.333333	2.66667
10							1.16667	0.166667
mean	1.16126	0.498918		1.90416	1.08698		0.774286	0.309048		1.21429	1.20714		2.21243	2.11217
SEM	0.211265	0.128222		0.486649	0.250988		0.129139	0.0469769		0.229314	0.355017		0.380537	0.293069
non-normality test
Shapiro-Wilk (P value)	0.3675	0.0218		0.3045	0.041		0.709	0.066		0.5053	0.5133		0.901	0.9595
