# Supplementary material for: In mice, discrete odors can selectively promote the neurogenesis of sensory neuron subtypes that they stimulate
Source: eLife. 2025 Jun 18;13:RP96152. doi: 10.7554/eLife.96152 (PMC12176391; doi:10.7554/eLife.96152)
Supplement: Figure 3—figure supplement 1—source data 1. [file elife-96152-fig3-figsupp1-data1.xlsx]

## Sheet: Fig 3 - S1
	UNO-treated mice, total Olfr235 (OR+) OSNs per half-section									UNO-treated mice, newborn Olfr1440 (OR+/EdU+) OSNs per half-section													UNO-treated mice, total Olfr1440 (OR+) OSNs per half-section													UNO-treated mice, newborn Olfr1431 (OR+/EdU+) OSNs per half-section													UNO-treated mice, total Olfr1431 (OR+) OSNs per half-section
	♂ ← ♂			♀ ← ♀			♀ ← ♂			♂ ← ♂			♀ ← ♀			♀ ← ♂			UNO effect size [Open/Closed (Log2)]				♂ ← ♂			♀ ← ♀			♀ ← ♂			UNO effect size [Open/Closed (Log2)]				♂ ← ♂			♀ ← ♀			♀ ← ♂			UNO effect size [Open/Closed (Log2)]				♂ ← ♂
mouse #	Open	Closed		Open	Closed		Open	Closed		Open	Closed		Open	Closed		Open	Closed		♂ ← ♂	♀ ← ♀	♀ ← ♂		Open	Closed		Open	Closed		Open	Closed		♂ ← ♂	♀ ← ♀	♀ ← ♂		Open	Closed		Open	Closed		Open	Closed		♂ ← ♂	♀ ← ♀	♀ ← ♂		Open
1	22.6667	16.1667		19.3333	14.8333		34.2222	24.5556		1.66667	0.444444		0.222222	0.111111		3	3		1.90689	1	0		79.3333	60.5556		38.5556	29.3333		55.3	34.3		0.389668	0.394398	0.689071		0.428571	0.285714		1.875	0.375		1	0.25		0.584963	2.32193	2		8.85714
2	20.5	12.2		14.5	9		35.375	26		0.2	0.2		0.727273	0.454545		2.55556	1.66667		0	0.678072	0.616671		51.8333	37.8		30	29.0909		45.3333	29.2222		0.455494	0.0443941	0.633506		0.8	0.4		1.75	0.25		1.16667	0.333333		1	2.80735	1.80735		11
3	20	16.8182		16.5	16.25		22.2857	12.8571		0.636364	0.727273		1.9	0.6		2.63636	1		-0.192645	1.66297	1.39855		43.9091	29.2727		41.4	22.4		30	16.1818		0.584963	0.886132	0.890589		0.714286	0.571429		1	0.571429		0.5	0.25		0.321928	0.807355	1		7.42857
4	24.6364	23		14.25	17.75		17	11.8182		1.08333	1.08333		1.83333	1.66667		4.75	2.625		0	0.137504	0.85561		44	30		57.8333	37.5		32.125	22.5		0.552541	0.625011	0.513771		1	0.2		1.66667	0.666667		1	0.125		2.32193	1.32193	3		8.2
5	37.6	16.2		22.2308	19.5385		21.4615	13.6154		5	2.85714		2	1		2.84615	1		0.807355	1	1.50901		75.2857	47.5714		49	21.8		33.4615	18.3846		0.662281	1.16845	0.864005		0.5	0.5		1.09091	0.727273		0.4	0.1		0	0.584963	2		11.25
6	21.8333	11.3333		23.3333	16.0833		22.1111	14.7778		1.38462	1.23077		1.55556	0.666667					0.169925	1.22239			33.1538	19.8462		42.1111	28.5556					0.740317	0.560429			1.4	0.2		1.11111	0.222222					2.80735	2.32193			11.4
7	24.0667	14.1333					19.5714	13.8571		2.38462	1.23077		4.35714	3.14286					0.954196	0.471306			34.0769	19		33.2143	27.6429					0.842796	0.264897			0.333333	0.166667		1	0.166667					1	2.58496			9.83333
8										1.6	1.1		3.125	2.25					0.540568	0.473931			34.6	22.4		32.75	25.25					0.627273	0.375212			0.2	0.2								0				10.8
9										3.18182	0.909091								1.80735				28.6364	16.9091								0.760049				1.2	0.4								1.58496				15.8
10																																				1.16667	0.166667								2.80735				12
mean	24.4719	15.6931		18.3579	15.5759		24.5753	16.783		1.90416	1.08698		1.96507	1.23648		3.15761	1.85833		0.665961	0.830771	0.875969		47.2032	31.4839		40.608	27.6966		39.244	24.1177		0.623931	0.539866	0.718188		0.774286	0.309048		1.35624	0.425608		0.813333	0.211667		1.24285	1.82149	1.96147		10.6569
SEM	2.28105	1.45389		1.59076	1.47122		2.73047	2.22562		0.486649	0.250988		0.459573	0.36621		0.405692	0.412395		0.259051	0.172362	0.274664		6.16529	4.91198		3.28194	1.74376		4.81894	3.37786		0.0487799	0.126213	0.0709893		0.129139	0.0469769		0.146777	0.0862154		0.152242	0.0434294		0.344239	0.340264	0.318566		0.742918
non-normality test
Shapiro-Wilk (P value)	0.0059	0.359		0.3565	0.3253		0.0626	0.0152		0.3045	0.041		0.6525	0.3294		0.0173	0.2699		0.1874	0.9	0.6727		0.0563	0.1821		0.5268	0.319		0.2365	0.6776		0.9751	0.8938	0.6301		0.709	0.066		0.0461	0.3125		0.2229	0.5067		0.181	0.2183	0.6104		0.4223
[truncated: 44 more columns]
