# Supplementary material for: In mice, discrete odors can selectively promote the neurogenesis of sensory neuron subtypes that they stimulate
Source: eLife. 2025 Jun 18;13:RP96152. doi: 10.7554/eLife.96152 (PMC12176391; doi:10.7554/eLife.96152)
Supplement: Figure 3—figure supplement 2—source data 1. [file elife-96152-fig3-figsupp2-data1.xlsx]

## Sheet: Fig 3 - S2
	normalization methods for quantification of newborn Olfr235 (OR+/EdU+) OSN in OEs of non-occluded ♀ ← ♀ and ♂ ← ♂ mice
	per half-section			per number of EdU+ cells			per sq mm DAPI+ area			effect size [♂/(avg ♀) (Log2)]
mouse #	♀ ← ♀	♂ ← ♂		♀ ← ♀	♂ ← ♂		♀ ← ♀	♂ ← ♂		1/2-section	EdU+ cells	DAPI+ area
1	0.444444	0.785714		0.000229122	0.000564683		0.18202	0.406661		0.119526	0.303529	0.393407
2	0.785714	0.583333		0.000256068	0.000230425		0.307887	0.202375		-0.310159	-0.989616	-0.613387
3	0.363636	1.3		0.000168698	0.000609633		0.126765	0.564895		0.845961	0.414029	0.867563
4	0.6	1.83333		0.000314545	0.00110187		0.220235	0.82933		1.34192	1.26797	1.42153
5	0.333333	2.36364		0.000288586	0.00168515		0.152368	0.806612		1.70846	1.88089	1.38145
6	1	2.76923		0.000752964	0.00183014		0.443364	1.1042		1.93693	1.99997	1.8345
7	1	2.22222		0.000723792	0.00122038		0.528501	0.758824		1.61945	1.41535	1.29334
8	0.285714	1.61538		0.000242645	0.00115779		0.114489	0.671236		1.15933	1.33939	1.1164
9	0.692308	0.846154		0.000593591	0.000297673		0.390268	0.328616		0.226441	-0.620184	0.0859837
10	1.72727	1.88889		0.00100543	0.00119198		0.630135	0.653537		1.38499	1.38138	1.07785
mean	0.723242	1.62079		0.000457544	0.000988972		0.309603	0.632628		1.16415	1.11202	1.03094
SEM	0.138717	0.231569		9.11792e-05	0.000173379		0.0573048	0.0844841		0.239624	0.323771	0.231395
