# Supplementary material for: In mice, discrete odors can selectively promote the neurogenesis of sensory neuron subtypes that they stimulate
Source: eLife. 2025 Jun 18;13:RP96152. doi: 10.7554/eLife.96152 (PMC12176391; doi:10.7554/eLife.96152)
Supplement: Figure 3—figure supplement 3—source data 1. [file elife-96152-fig3-figsupp3-data1.xlsx]

## Sheet: Fig 3 - S3
	UNO-treated mice, newborn Olfr1431 (OR+/EdU+) OSNs per half-section									UNO-treated mice, newborn Olfr235 (OR+/EdU+) OSNs per half-section									UNO-treated mice, newborn Olfr1440 (OR+/EdU+) OSNs per half-section									UNO-treated mice, newborn Olfr1437 (OR+/EdU+) OSNs per half-section									UNO-treated mice, newborn Olfr912 (OR+/EdU+) OSNs per half-section
	♂ ← ♂			♂ ← adult ♂+♀			UNO effect size [Op/Cl (Log2)]			♂ ← ♂			♂ ← adult ♂+♀			UNO effect size [Op/Cl (Log2)]			♂ ← ♂			♂ ← adult ♂+♀			UNO effect size [Op/Cl (Log2)]			♂ ← ♂			♂ ← adult ♂+♀			UNO effect size [Op/Cl (Log2)]			♂ ← ♂			♂ ← adult ♂+♀			UNO effect size [Op/Cl (Log2)]
mouse #	Open	Closed		Open	Closed		♂ ← ♂	♂ ← adults		Open	Closed		Open	Closed		♂ ← ♂	♂ ← adults		Open	Closed		Open	Closed		♂ ← ♂	♂ ← adults		Open	Closed		Open	Closed		♂ ← ♂	♂ ← adults		Open	Closed		Open	Closed		♂ ← ♂	♂ ← adults
1	0.428571	0.285714		0.538462	0.230769		0.584963	1.22239		1.66667	0.5		0.5	0.166667		1.73697	1.58496		1.66667	0.444444		3.33333	2.33333		1.90689	0.514573		1.85714	0.857143		1.66667	1.55556		1.11548	0.0995357		2	3		1.5	1.5		-0.584963	0
2	0.8	0.4		0.923077	0.0769231		1	3.58496		0.9	0.3		1.625	0.875		1.58496	0.893085		0.2	0.2		4.25	3		0	0.5025		1	0.571429		1.2	1.4		0.807355	-0.222392		3.25	3.5		1.4	1.4		-0.106915	0
3	0.714286	0.571429		0.846154	0.0769231		0.321928	3.45943		0.727273	0.272727		1.44444	0.555556		1.41504	1.37851		0.636364	0.727273		2.75	2.25		-0.192645	0.289507		1.2	2.2		1.57143	0.857143		-0.874469	0.874469		1.4	0.8		3.375	2.875		0.807355	0.231326
4	1	0.2		1.75	0.25		2.32193	2.80735		0.818182	0.636364		1.46154	0.692308		0.36257	1.078		1.08333	1.08333					0			0.8	1.2					-0.584963			3	1.85714		5	4.27273		0.691878	0.226771
5	0.5	0.5		1.625	0.75		0	1.11548		2.1	1.2		2	0.444444		0.807355	2.16993		5	2.85714					0.807355												2.83333	1.33333		3.5	3.5		1.08746	0
6	1.4	0.2		2.5	0.333333		2.80735	2.90689		0.583333	0.25					1.22239			1.38462	1.23077					0.169925												1.66667	2.16667					-0.378512
7	0.333333	0.166667					1			1.33333	0.333333					2			2.38462	1.23077					0.954196												1.42857	1.28571					0.152003
8	0.2	0.2					0												1.6	1.1					0.540568												4	2.4					0.736966
9	1.2	0.4					1.58496												3.18182	0.909091					1.80735												0.333333	2.66667					-3
10	1.16667	0.166667					2.80735
mean	0.774286	0.309048		1.36378	0.286325		1.24285	2.51608		1.16126	0.498918		1.4062	0.546795		1.30418	1.4209		1.90416	1.08698		3.44444	2.52778		0.665961	0.435527		1.21429	1.20714		1.47937	1.2709		0.11585	0.250537		2.21243	2.11217		2.955	2.70955		-0.0660806	0.0916193
SEM	0.129139	0.0469769		0.297305	0.10154		0.344239	0.443671		0.211265	0.128222		0.247608	0.119152		0.212846	0.222027		0.486649	0.250988		0.436562	0.237333		0.259051	0.0730932		0.229314	0.355017		0.142362	0.211696		0.495757	0.325514		0.380537	0.293069		0.677883	0.560073		0.413939	0.0561097
non-normality test
Shapiro-Wilk (P value)	0.709	0.066		0.6755	0.0387		0.181	0.1202		0.3675	0.0218		0.3855	0.9796		0.8391	0.786		0.3045	0.041		0.6369	N too small		0.1874	0.0769		0.5053	0.5133		0.3631	0.5367		0.2887	0.5531		0.9191	0.9335		0.3964	0.481		0.0246	0.0065
