# Supplementary material for: In mice, discrete odors can selectively promote the neurogenesis of sensory neuron subtypes that they stimulate
Source: eLife. 2025 Jun 18;13:RP96152. doi: 10.7554/eLife.96152 (PMC12176391; doi:10.7554/eLife.96152)
Supplement: Figure 3—source data 1. [file elife-96152-fig3-data1.xlsx]

## Sheet: Fig 3
	UNO-treated mice, newborn Olfr235 (OR+/EdU+) OSNs per half-section									UNO effect size [Open/Closed (Log2)]								non-occluded mice, newborn (OR+/EdU+) OSNs per half-section
	♂ ← ♂			♀ ← ♀			♀ ← ♂			newborn Olfr235 (OR+/EdU+) OSNs				total Olfr235 (OR+) OSNs				Olfr235				Olfr912
mouse #	Open	Closed		Open	Closed		Open	Closed		♂ ← ♂	♀ ← ♀	♀ ← ♂		♂ ← ♂	♀ ← ♀	♀ ← ♂		♀ ← ♀	♂ ← ♂	♀ ← ♂		♀ ← ♀	♂ ← ♂	♀ ← ♂
1	1.66667	0.5		0.166667	0.166667		0.666667	0.666667		1.74	0	0		0.48755	0.382248	0.478884		0.444444	0.785714	1.57143		3.0625	2.8	3.16667
2	0.9	0.3		0.3	0.1		2.75	0.75		1.58	1.58	1.87		0.748743	0.688056	0.444219		0.785714	0.583333	2.91667		2	2.27273	2.21429
3	0.727273	0.272727		0.137	0.5		1.5	0.857143		1.42	-1.87	0.81		0.249978	0.0220263	0.793549		0.363636	1.3	2		2.25	2.46667	2.69231
4	0.818182	0.636364		0.5	0.5		0.636364	0.272727		0.36	0	1.22		0.0991555	-0.316857	0.524527		0.6	1.83333	2.06667		2.54545	2	2.55556
5	2.1	1.2		0.846154	0.615385		1.07692	0.538462		0.81	0.46	1		1.21474	0.186241	0.656516		0.333333	2.36364	2.5
6	0.583333	0.25		1.08333	0.833333		2.33333	1.11111		1.22	0.38	1.07		0.94596	0.536826	0.581342		1	2.76923
7	1.33333	0.333333					2.57143	1		2		1.36		0.767935		0.498119		1	2.22222
8																		0.285714	1.61538
9																		0.692308	0.846154
10																		1.72727	1.88889
mean	1.16126	0.498918		0.482692	0.452564		1.64782	0.742301		1.30418	0.0925256	1.04817		0.644866	0.249757	0.568165		0.723242	1.62079	2.21095		2.46449	2.38485	2.6572
SEM	0.211265	0.128222		0.157353	0.112847		0.340562	0.107288		0.212846	0.458388	0.216654		0.147989	0.149334	0.0460129		0.138717	0.231569	0.229771		1.54958	1.13702	2.42031
non-normality test
Shapiro-Wilk (P value)	0.3675	0.0218		0.3537	0.6267		0.2329	0.9646		0.8391	0.3737	0.7075		0.9083	0.9283	0.371		0.0972	0.7647	0.9133		0.8506	0.991	0.9057
