# Supplementary material for: In mice, discrete odors can selectively promote the neurogenesis of sensory neuron subtypes that they stimulate
Source: eLife. 2025 Jun 18;13:RP96152. doi: 10.7554/eLife.96152 (PMC12176391; doi:10.7554/eLife.96152)
Supplement: Figure 4—figure supplement 1—source data 1. [file elife-96152-fig4-figsupp1-data1.xlsx]

## Sheet: Fig 4 - S1
	UNO-treated ♀ mice, newborn Olfr1440 (OR+/EdU+) OSNs per half-section																	UNO-treated ♀ mice, newborn Olfr1431 (OR+/EdU+) OSNs per half-section																	UNO-treated ♀ mice, newborn Olfr912 (OR+/EdU+) OSNs per half-section													UNO-treated ♀ mice, newborn Olfr1463 (OR+/EdU+) OSNs per half-section
	0% muscone			0.1% muscone			1% muscone			10% muscone			UNO effect size [Open/Closed (Log2)]					0% muscone			0.1% muscone			1% muscone			10% muscone			UNO effect size [Open/Closed (Log2)]					0% muscone			0.1% muscone			1% muscone			UNO effect size [Open/Closed (Log2)]				0% muscone
mouse #	Open	Closed		Open	Closed		Open	Closed		Open	Closed		0	0.1%	0.01	0.1		Open	Closed		Open	Closed		Open	Closed		Open	Closed		0	0.1%	0.01	0.1		Open	Closed		Open	Closed		Open	Closed		0	0.1%	0.01		Open	Closed
1	0.222222	0.111111		5	5		3.5	2.125		3.25	0.25		1	0	0.719892	3.70044		1.875	0.375		1.85714	0.571429		1.2	0.2		0.5	0.5		2.32193	1.70044	2.58496	0		1.8	1.8		3.28571	3.14286		2.83333	1.83333		0	0.0641303	0.628031		3.16667	2.16667
2	0.727273	0.454545		6.85714	3.57143		3.2	1.3		2.2	1		0.678072	0.941106	1.29956	1.1375		1.75	0.25		2.25	1		1.5	0.0833333		0.4	0.6		2.80735	1.16993	4.16993	-0.584963		1.83333	1.16667		4	4.33333		1.75	1.25		0.652077	-0.115477	0.485427		1.6	3
3	1.9	0.6		5	2.85714		2.66667	2		1.83333	1		1.66297	0.807355	0.415037	0.874469		1	0.571429		1.4	0.6		0.5	0.0833333		0.333333	0.166667		0.807355	1.22239	2.58496	1		0.2	1.4		3.42857	3.71429		2.16667	2.83333		-2.80735	-0.115477	-0.387023		2.28571	2.28571
4	1.83333	1.66667		6.33333	2.33333		5.2	2.6		2	0.625		0.137504	1.44057	1	1.67807		1.66667	0.666667		0.857143	0.142857		1	0.125		0.25	0.25		1.32193	2.58496	3	0		2.33333	1		2.28571	2.42857		4.25	3		1.22239	-0.0874628	0.5025		3.66667	2.33333
5	2	1		3.75	2.5		3.57143	1.85714		1.83333	2.16667		1	0.584963	0.943416	-0.241008		1.09091	0.727273		0.666667	0.166667		0.571429	0.142857		0.285714	0.285714		0.584963	2	2	0		2.4	2.8								-0.222392
6	1.55556	0.666667					3.28571	2.14286					1.22239		0.616671			1.11111	0.222222					0.666667	0.0833333					2.32193		3
7	4.35714	3.14286											0.471306					1	0.166667											2.58496
8	3.125	2.25											0.473931
mean	1.96507	1.23648		5.3881	3.25238		3.57063	2.00417		2.22333	1.00833		0.830771	0.754799	0.83243	1.4299		1.35624	0.425608		1.40619	0.49619		0.906349	0.119643		0.35381	0.360476		1.82149	1.73554	2.88998	0.0830075		1.71333	1.63333		3.25	3.40476		2.75	2.22917		-0.231056	-0.0635717	0.307234		2.67976	2.44643
SEM	0.459573	0.36621		0.549371	0.485948		0.350976	0.173814		0.265393	0.321239		0.172362	0.235194	0.128068	0.648185		0.146777	0.0862154		0.296965	0.158697		0.161468	0.0191311		0.0443497	0.0813004		0.340264	0.262291	0.296682	0.255708		0.397995	0.321109		0.356547	0.40616		0.547511	0.415798		0.692214	0.0430764	0.233592		0.459367	0.187823
non-normality test
Shapiro-Wilk (P value)	0.6525	0.3294		0.6974	0.2848		0.107	0.7107		0.033	0.4188		0.9	0.9568	0.9726	0.6843		0.0461	0.3125		0.7274	0.4454		0.5211	0.1053		0.767	0.5276		0.2183	0.5596	0.4229	0.1869		0.0801	0.3231		0.6926	0.986		0.5945	0.4513		0.2678	0.0336	0.0363		0.8323	0.0292
