# Supplementary material for: In mice, discrete odors can selectively promote the neurogenesis of sensory neuron subtypes that they stimulate
Source: eLife. 2025 Jun 18;13:RP96152. doi: 10.7554/eLife.96152 (PMC12176391; doi:10.7554/eLife.96152)
Supplement: Figure 4—figure supplement 2—source data 1. [file elife-96152-fig4-figsupp2-data1.xlsx]

## Sheet: Fig 4 - S2
	UNO-treated ♀ mice, total Olfr235 (OR+/EdU+) OSNs per half-section																	UNO-treated ♀ mice, total Olfr1440 (OR+/EdU+) OSNs per half-section																	UNO-treated ♀ mice, total Olfr1431 (OR+/EdU+) OSNs per half-section
	0% muscone			0.1% muscone			1% muscone			10% muscone			UNO effect size [Open/Closed (Log2)]					0% muscone			0.1% muscone			1% muscone			10% muscone			UNO effect size [Open/Closed (Log2)]					0% muscone			0.1% muscone			1% muscone			10% muscone			UNO effect size [Open/Closed (Log2)]
mouse #	Open	Closed		Open	Closed		Open	Closed		Open	Closed		0	0.1%	0.01	0.1		Open	Closed		Open	Closed		Open	Closed		Open	Closed		0	0.1%	0.01	0.1		Open	Closed		Open	Closed		Open	Closed		Open	Closed		0	0.1%	0.01
1	19.3333	14.8333		20.8333	14.6667		15.3	17.3		17.8	12.8		0.382248	0.506353	-0.17724	0.475733		38.5556	29.3333		39.3333	40.3333		22.25	40.75		22.25	15.75		0.394398	-0.0362202	-0.872995	0.498454		17.375	8.875		16.3333	10.3333		10.2	8		5.5	5.25		0.969194	0.660514	0.350497
2	14.5	9		25.3333	18.8333		15.2	12.6		18.5	13		0.688056	0.427749	0.270648	0.509014		30	29.0909		35.1429	33		31.4	26.6		23.2	26.6		0.0443941	0.0907655	0.239338	-0.197301		12.5	6.75		16.75	8.75		9.83333	3.33333		16.8	7.6		0.888969	0.936806	1.56071
3	16.5	16.25		20.3333	14.6667		18	18.2		11.5714	12		0.0220263	0.471306	-0.0159415	-0.0524674		41.4	22.4		40	33.1429		26	43.5		23.5	21.8333		0.886132	0.271302	-0.742504	0.106128		10.4286	5.42857		14.4	10.4		9.83333	7.83333		10.5	6.33333		0.941897	0.469485	0.328054
4	14.25	17.75		32	30.1429		28.3333	26		14.125	16.875		-0.316857	0.0862557	0.123989	-0.256637		57.8333	37.5		41	44.3333		32.6	36.8		26.125	20.875		0.625011	-0.112768	-0.174834	0.323655		14.5	6.83333		15.1429	13.1429		12.75	7		11	10		1.08539	0.204358	0.86507
5	22.2308	19.5385		29.75	22		27.4	18.4		16.25	20.875		0.186241	0.435386	0.57447	-0.361336		49	21.8		27.75	37.25		38.1429	36.1429		25.3333	41.6667		1.16845	-0.424753	0.0777024	-0.717857		14.7273	8.54545		12.1667	10.3333		13.2857	8.42857		13.4286	11.2857		0.785261	0.235628	0.656516
6	23.3333	16.0833					25.6667	18.3333					0.536826		0.485427			42.1111	28.5556					33.4286	41.4286					0.560429		-0.309544			14.5556	9.11111					12.6667	10					0.675871		0.341037
7																		33.2143	27.6429											0.264897					14.8333	7.83333											0.921145
8																		32.75	25.25											0.375212
mean	18.3579	15.5759		25.65	20.0619		21.65	18.4722		15.6493	15.11		0.249757	0.38541	0.210225	0.0628613		40.608	27.6966		36.6452	37.6119		30.6369	37.5369		24.0817	25.345		0.539866	-0.0423347	-0.297139	0.0026157		14.1314	7.62526		14.9586	10.5919		11.4282	7.43254		11.4457	8.09381		0.89539	0.501358	0.683648
SEM	1.59076	1.47122		2.33131	2.87322		2.51071	1.75711		1.2662	1.67049		0.149334	0.0760883	0.118431	0.182324		3.28194	1.74376		2.43748	2.16745		2.31236	2.47069		0.714582	4.42916		0.126213	0.115613	0.180128	0.214323		0.817326	0.508928		0.81363	0.709596		0.666508	0.913914		1.85802	1.12366		0.0499361	0.136891	0.196445
non-normality test
Shapiro-Wilk (P value)	0.3565	0.3253		0.4171	0.3082		0.1011	0.1945		0.6585	0.1899		0.9283	0.0176	0.8225	0.2119		0.5268	0.319		0.1671	0.4858		0.8151	0.272		0.6224	0.3115		0.8938	0.9323	0.6702	0.7376		0.4052	0.5343		0.6755	0.213		0.0526	0.2776		0.9232	0.7093		0.9053	0.6081	0.0688
[truncated: 16 more columns]
