# Supplementary material for: In mice, discrete odors can selectively promote the neurogenesis of sensory neuron subtypes that they stimulate
Source: eLife. 2025 Jun 18;13:RP96152. doi: 10.7554/eLife.96152 (PMC12176391; doi:10.7554/eLife.96152)
Supplement: Figure 4—figure supplement 3—source data 1. [file elife-96152-fig4-figsupp3-data1.xlsx]

## Sheet: Fig 4 - S3
	non-occluded mice, newborn (OR+/EdU+) OSNs per half-section
	Olfr912					Olfr827			Olfr1325
mouse #	♀ ← ♀	♀ ← musc	♀ ← amb	♀ ← SBT		♀ ← ♀	♀ ← musc		♀ ← ♀	♀ ← musc
1	3.0625	3.09091	3	2.07692		1.71429	2.25		1.08333	1.375
2	2	2.33333	3.28571	2.21429		1.5	1.42857		0.8	0.928571
3	2.25	2.66667	2.28571	1.38462		1.33333	1.90909		1.18182	0.769231
4	2.54545	1.90909	2.71429	2.11111		1.5	1		0.5	0.727273
5			2.42857
mean	2.46449	2.5	2.74286	1.94673		1.5119	1.64692		0.891288	0.950019
SEM	2.46449	2.5	2.74286	1.94673		0.0780647	0.273651		0.153495	0.148147
non-normality test
Shapiro-Wilk (P value)	0.8506	0.9942	0.8164	0.049		0.651	0.909		0.6659	0.2014
