# Supplementary material for: In mice, discrete odors can selectively promote the neurogenesis of sensory neuron subtypes that they stimulate
Source: eLife. 2025 Jun 18;13:RP96152. doi: 10.7554/eLife.96152 (PMC12176391; doi:10.7554/eLife.96152)
Supplement: Figure 4—figure supplement 4—source data 1. [file elife-96152-fig4-figsupp4-data1.xlsx]

## Sheet: Fig 4 - S4
	normalization methods for quantification of newborn Olfr235 (OR+/EdU+) OSN in OEs of non-occluded ♀ ← ♀ and ♀ ← 1% muscone
	per half-section			per number of EdU+ cells			per unit DAPI+ area			UNO effect size [(♀←musc)/(avg ♀←♀) (Log2)]
mouse #	♀ ← ♀	♀ ← musc		♀ ← ♀	♀ ← musc		♀ ← ♀	♀ ← musc		1/2-section	EdU+ cells	DAPI+ area
1	0.444444	3.54545		0.000229122	0.00265241		0.18202	1.43478		2.29342	2.53532	2.21234
2	0.785714	1.5		0.000256068	0.00100642		0.307887	0.519158		1.05241	1.13724	0.745752
3	0.363636	2.25		0.000168698	0.00163671		0.126765	0.852873		1.63737	1.83881	1.46191
4	0.6	1.81818		0.000314545	0.00124856		0.220235	0.622849		1.32995	1.44829	1.00846
5	0.333333	2.5		0.000288586	0.00256682		0.152368	1.18221		1.78938	2.488	1.933
6	1			0.000752964			0.443364
7	1			0.000723792			0.528501
8	0.285714			0.000242645			0.114489
9	0.692308			0.000593591			0.390268
10	1.72727			0.00100543			0.630135
mean	0.723242	2.32273		0.000457544	0.00182218		0.309603	0.922374		1.62051	1.88953	1.47229
SEM	0.138717	0.350943		9.11792e-05	0.000337096		0.0573048	0.171348		0.210805	0.277346	0.274137
