# Supplementary material for: In mice, discrete odors can selectively promote the neurogenesis of sensory neuron subtypes that they stimulate
Source: eLife. 2025 Jun 18;13:RP96152. doi: 10.7554/eLife.96152 (PMC12176391; doi:10.7554/eLife.96152)
Supplement: Figure 4—source data 1. [file elife-96152-fig4-data1.xlsx]

## Sheet: Fig 4
	UNO-treated ♀ mice, newborn Olfr235 (OR+/EdU+) OSNs per half-section																	non-occluded mice, newborn (OR+/EdU+) OSNs per half-section
	0% muscone			0.1% muscone			1% muscone			10% muscone			UNO effect size [Open/Closed (Log2)]					Olfr235						Olfr1440						Olfr1431
mouse #	Open	Closed		Open	Closed		Open	Closed		Open	Closed		0	0.1%	0.01	0.1		♀ ← ♀	♀ ← musc	♀ ← amb	♀ ← SBT	♀ ← IAA		♀ ← ♀	♀ ← musc	♀ ← amb	♀ ← SBT	♀ ← IAA		♀ ← ♀	♀ ← musc	♀ ← amb	♀ ← SBT	♀ ← IAA
1	0.166667	0.166667		1.83333	1.16667		1	0.2		2.8	1.6		0	0.652077	2.32193	0.807355		0.444444	3.54545	2.63636	0.769231	1.07143		2.16667	5.5	6.33333	1.93333	1.4375		1.1	1.88889	1.5	0.8125	0.833333
2	0.3	0.1		2.66667	1		1.1	0.6		1.5	0.75		1.58496	1.41504	0.874469	1		0.785714	1.5	3.41667	0.692308	0.857143		1.11111	4.7619	4	1.92857	2.92308		0.875	1.61538	1.09091	0.545455	0.857143
3	0.137	0.5		1.66667	0.666667		2.4	1.2		1.85714	1.57143		-1.86775	1.32193	1	0.241008		0.363636	2.25	2.92857	1.23077	0.75		1.41667	5.91667	5.41667	1.92308	2.61538		0.833333	0.818182	1.07143	0.5	0.833333
4	0.5	0.5		1.71429	0.714286		1.66667	1		1.75	1.875		0	1.26303	0.736966	-0.0995357		0.6	1.81818	2.5	0.916667	0.818182		1.63636	2.75	4	2.66667	1.41667		0.636364	1.54545	1.35714	0.5	0.357143
5	0.846154	0.615385		3	1		1.4	0.8		1	1.625		0.459432	1.58496	0.807355	-0.70044		0.333333	2.5	2.14286	1	0.285714		2.8	2.09091	3.78571	3.18182	2.25		0.571429	0.916667	0.916667	1.14286	0.833333
6	1.08333	0.833333					2.5	1.16667					0.378512		1.09954			1												0.866667
7																		1												0.75
8																		0.285714												0.6875
9																		0.692308												0.888889
10																		1.72727
mean	0.482692	0.452564		2.17619	0.909524		1.67778	0.827778		1.78143	1.48429		0.0925256	1.24741	1.14004	0.249678		0.723242	2.32273	2.72489	0.921795	0.756494		1.82616	4.2039	4.70714	2.32669	2.12853		0.80102	1.35692	1.18723	0.700162	0.742857
SEM	0.157353	0.112847		0.27475	0.0947607		0.262561	0.155972		0.294452	0.191392		0.458388	0.158471	0.242335	0.308118		0.138717	0.350943	0.214151	0.0942199	0.129382		0.298271	0.758399	0.499853	0.257193	0.305562		0.0531312	0.208495	0.105496	0.125033	0.0965387
non-normality test
Shapiro-Wilk (P value)	0.3537	0.6267		0.1191	0.3686		0.295	0.5045		0.7329	0.0729		0.3737	0.2209	0.0062	0.7935		0.0972	0.6844	0.9588	0.8456	0.3996		0.7811	0.3794	0.1337	0.0535	0.3272		0.8114	0.3599	0.6194	0.1007	0.0007
