# Supplementary material for: In mice, discrete odors can selectively promote the neurogenesis of sensory neuron subtypes that they stimulate
Source: eLife. 2025 Jun 18;13:RP96152. doi: 10.7554/eLife.96152 (PMC12176391; doi:10.7554/eLife.96152)
Supplement: Figure 5—source data 1. [file elife-96152-fig5-data1.xlsx]

## Sheet: Fig 5
	non-occluded adult mice, newborn (OR+/EdU+) OSNs per half-section
	Olfr235			Olfr1440			Olfr1431			Olfr912
mouse #	♀ ← ♀	♀ ← musc		♀ ← ♀	♀ ← musc		♀ ← ♀	♀ ← musc		♀ ← ♀	♀ ← musc
1	2.42857	2.14286		0.571429	5.44444		0.5	0.461538		2.91667	3.42857
2	0.727273	2.44444		2.2	6		0.454545	0.777778		1.5	1.77778
3	1	1.66667		2.2	3.16667		0.4	1.5		1.69231	1.66667
4	0.875	1.36364		1.57143	1.75		0.571429	0.454545		2.57143	2
5	0.75	2.16667		2.92857	4.16667		0.153846	1		2.72727	2.90909
6		1.27273						1.07692			2.6
7		1.18182						0.352941
mean	1.15617	1.7484		1.89429	4.10556		0.415964	0.803389		2.28154	2.39702
SEM	0.321821	0.190052		0.394389	0.768617		0.0713023	0.157424		0.286714	0.285308
non-normality test
Shapiro-Wilk (P value)	0.0065	0.3212		0.716	0.8622		0.3761	0.4862		0.2421	0.5419
