# Supplementary material for: In mice, discrete odors can selectively promote the neurogenesis of sensory neuron subtypes that they stimulate
Source: eLife. 2025 Jun 18;13:RP96152. doi: 10.7554/eLife.96152 (PMC12176391; doi:10.7554/eLife.96152)
Supplement: Figure 6—figure supplement 1—source data 1. [file elife-96152-fig6-figsupp1-data1.xlsx]

## Sheet: Fig 6 - S1
	UNO-treated ♂ ← ♂ mice, newborn Olfr1440 (OR+/EdU+) OSNs per half-section									UNO-treated ♂ ← ♂ mice, newborn Olfr1431 (OR+/EdU+) OSNs per half-section									UNO-treated ♂ ← ♂ mice, newborn Olfr912 (OR+/EdU+) OSNs per half-section									UNO-treated ♂ ← ♂ mice, newborn Olfr1463 (OR+/EdU+) OSNs per half-section									UNO-treated ♀ ← 0.1% muscone, newborn Olfr912 (OR+/EdU+) OSNs per half-section									UNO-treated ♀ ← ♀ mice, newborn Olfr235 (OR+/EdU+) OSNs per half-section
	4 d post-EdU			7 d post-EdU			UNO effect size [Op/Cl (Log2)]			4 d post-EdU			7 d post-EdU			UNO effect size [Op/Cl (Log2)]			4 d post-EdU			7 d post-EdU			UNO effect size [Op/Cl (Log2)]			4 d post-EdU			7 d post-EdU			UNO effect size [Op/Cl (Log2)]			4 d post-EdU			7 d post-EdU			UNO effect size [Op/Cl (Log2)]			4 d post-EdU			7 d post-EdU
mouse #	Open	Closed		Open	Closed		4 d post-EdU	7 d post-EdU		Open	Closed		Open	Closed		4 d post-EdU	7 d post-EdU		Open	Closed		Open	Closed		4 d post-EdU	7 d post-EdU		Open	Closed		Open	Closed		4 d post-EdU	7 d post-EdU		Open	Closed		Open	Closed		4 d post-EdU	7 d post-EdU		Open	Closed		Open
1	6.375	4.375		1.66667	0.444444		0.543142	1.90689		1.71429	0.714286		0.428571	0.285714		1.26303	0.584963		5	5.14286		2	3		-0.040642	-0.584963		5.28571	5.28571		3	3.2		0	-0.0931094		1.8	3		3.28571	3.14286		-0.180572	0.0641303		0.9	0.8		0.166667
2	6	5.28571		0.2	0.2		0.182864	0		1.83333	0.833333		0.8	0.4		1.1375	1		3.57143	4		3.25	3.5		-0.163499	-0.106915		2.83333	3.66667		4.57143	3.57143		-0.371969	0.356144		2.2	1		4	4.33333		0.137504	-0.115477		1.71429	1.57143		0.3
3	6.83333	3.5		0.636364	0.727273		0.965235	-0.192645		1.2	0.4		0.714286	0.571429		1.58496	0.321928		2.16667	1.83333		1.4	0.8		0.241008	0.807355		2.6	2.2		2.16667	2.66667		0.241008	-0.29956		0.666667	0.833333		3.42857	3.71429		0.192645	-0.115477					0.137
4	8.25	6.625		1.08333	1.08333		0.316474	0		2	0.833333		1	0.2		1.26303	2.32193		4	3.57143		3	1.85714		0.163499	0.691878		4.85714	3.28571		4.2	3.8		0.563901	0.14439					2.28571	2.42857			-0.0874628					0.5
5				5	2.85714			0.807355					0.5	0.5			0					2.83333	1.33333			1.08746																							0.846154
6				1.38462	1.23077			0.169925					1.4	0.2			2.80735					1.66667	2.16667			-0.378512																							1.08333
7				2.38462	1.23077			0.954196					0.333333	0.166667			1					1.42857	1.28571			0.152003
8				1.6	1.1			0.540568					0.2	0.2			0					4	2.4			0.736966
9				3.18182	0.909091			1.80735					1.2	0.4			1.58496					0.333333	2.66667			-3
10													1.16667	0.166667			2.80735
mean	6.86458	4.94643		1.90416	1.08698		0.501929	0.665961		1.6869	0.695238		0.774286	0.309048		1.31213	1.24285		3.68452	3.6369		2.21243	2.11217		0.0500915	-0.0660806		3.89405	3.60952		3.48452	3.30952		0.108235	0.026966		1.55556	1.61111		3.25	3.40476		0.0498588	-0.0635717		1.30714	1.18571		0.482692
SEM	0.492236	0.667795		0.486649	0.250988		0.171403	0.259051		0.172553	0.102335		0.129139	0.0469769		0.095635	0.344239		0.587841	0.686591		0.380537	0.293069		0.0927199	0.413939		0.68702	0.639302		0.552628	0.24739		0.197394	0.142356		0.4592	0.696109		0.356547	0.40616		0.11631	0.0430764		0.407143	0.385714		0.157353
non-normality test
Shapiro-Wilk (P value)	0.4584	0.9475		0.3045	0.041		0.6547	0.1874		0.5558	0.0865		0.709	0.066		0.2469	0.181		0.9084	0.8104		0.901	0.9595		0.6907	0.0246		0.1669	0.8761		0.6298	0.7985		0.9951	0.9593		0.4974	0.1572		0.669	0.9773		0.2385	0.0336		N too small	N too small		0.3627
[truncated: 7 more columns]
