# Supplementary material for: In mice, discrete odors can selectively promote the neurogenesis of sensory neuron subtypes that they stimulate
Source: eLife. 2025 Jun 18;13:RP96152. doi: 10.7554/eLife.96152 (PMC12176391; doi:10.7554/eLife.96152)
Supplement: Figure 6—source data 1. [file elife-96152-fig6-data1.xlsx]

## Sheet: Fig 6
	UNO-treated ♂ ← ♂ mice, newborn Olfr235 (OR+/EdU+) OSNs per half-section									UNO-treated ♀ ← 0.1% muscone, newborn Olfr235 (OR+/EdU+) OSNs per half-section									non-occluded ♀: effects of muscone exposure and time (d) post-EdU on newborn (OR+/EdU+) OSNs per half-section
	4 d post-EdU			7 d post-EdU			UNO effect size [Op/Cl (Log2)]			4 d post-EdU			7 d post-EdU			UNO effect size [Op/Cl (Log2)]			Olfr235					Olfr1440					Olfr1431
mouse #	Open	Closed		Open	Closed		4 d post-EdU	7 d post-EdU		Open	Closed		Open	Closed		4 d post-EdU	7 d post-EdU		♀ ← ♀, 4 d	♀ ← ♀, 7 d	♀ ← musc, 4 d	♀ ← musc, 7 d		♀ ← ♀, 4 d	♀ ← ♀, 7 d	♀ ← musc, 4 d	♀ ← musc, 7 d		♀ ← ♀, 4 d	♀ ← ♀, 7 d	♀ ← musc, 4 d	♀ ← musc, 7 d
1	2.88889	1		1.66667	0.5		1.53051	1.73697		2.66667	1.5		1.83333	1.16667		0.830075	0.652077		0.833333	0.444444	1.66667	3.54545		2.25	2.16667	5.54545	4.07692		0.833333	1.1	0.916667	1.88889
2	1.66667	0.555556		0.9	0.3		1.58496	1.58496		2	1		2.66667	1		1	1.41504		1	0.785714	2.25	1.5		2.83333	1.11111	5.07143	6.28571		0.416667	0.875	1.78571	1.61538
3	2.27273	1.18182		0.727273	0.272727		0.943416	1.41504		1.5	0.25		1.66667	0.666667		2.58496	1.32193		1.07692	0.363636	1.83333	2.25		1.25	1.41667	5	4.77778		0.5	0.833333	0.846154	0.818182
4	2.875	1.5		0.818182	0.636364		0.938599	0.36257		2.16667	0.833333		1.71429	0.714286		1.37851	1.26303			0.6	2.27273	1.81818			1.63636	4.90909	4.77778			0.636364	0.833333	1.54545
5				2.1	1.2			0.807355		1	0.5		3	1		1	1.58496			0.333333		2.5			2.8					0.571429		0.916667
6				0.583333	0.25			1.22239												1										0.866667
7				1.33333	0.333333			2												1										0.75
8																				0.285714										0.6875
9																				0.692308										0.888889
10																				1.72727
mean	2.42582	1.05934		1.16126	0.498918		1.24937	1.30418		1.86667	0.816667		2.17619	0.909524		1.35871	1.24741		0.970085	0.723242	2.00568	2.32273		2.11111	1.82616	5.13149	4.97955		0.583333	0.80102	1.09547	1.35692
SEM	0.290968	0.197168		0.211265	0.128222		0.178384	0.212846		0.285774	0.214735		0.27475	0.0947607		0.319444	0.158471		0.0718915	0.138717	0.151559	0.350943		0.462314	0.298271	0.141929	0.465674		0.127294	0.0531312	0.230811	0.208495
non-normality test
Shapiro-Wilk (P value)	0.2725	0.976		0.3675	0.0218		0.0504	0.8391		0.971	0.8842		0.0661	0.2717		0.051	0.2209		0.6086	0.0972	0.231	0.6844		0.7092	0.7811	0.1707	0.3614		0.3535	0.8114	0.0117	0.3599
