# Supplementary material for: In mice, discrete odors can selectively promote the neurogenesis of sensory neuron subtypes that they stimulate
Source: eLife. 2025 Jun 18;13:RP96152. doi: 10.7554/eLife.96152 (PMC12176391; doi:10.7554/eLife.96152)
Supplement: Supplementary file 1. [file elife-96152-supp1.xlsx]

## Sheet: Sheet1
Experimental condition	UNO timepoint	Odorant exposure period	EdU treament timepoint(s)	OE dissection timepoint (d post-EdU)	Odorant concentration (%)	Number of biological replicates (mice)
						scRNA-seq	Olfr235 (Or5an11)	Olfr1440 (Or5an6)	Olfr1431 (Or5an9)	Olfr1437 (Or5an1b)	Olfr1419 (Or10q3)	Olfr912 (Or8b48)	Olfr1463 (Or5b109)	Olfr827 (Or9k7)	Olfr1325 (Or13ae2)
Sex-separated males (♂ ← ♂)	PD 14	N/A	N/A	PD 28 (N/A)	N/A	2	-	-	-	-	-	-	-	-	-
			PD 28	PD 32 (4 d)			4	4	4	-	-	4	4	-	-
				PD 35 (7 d)			7	9	10	4	6	9	4	-	-
	N/A			PD 35 (7 d)			10	-	-	-	-	4	-	-	-
Sex-separated females (♀ ← ♀)	PD 14	N/A	PD 28	PD 32 (4 d)	N/A		2	-	-	-	-	-	-	-	-
				PD 35 (7 d)			6	8	7	-	-	5	4	-	-
	N/A		PD 28	PD 35 (7 d)			10	5	9	-	-	4	-	-	-
			PD 28	PD 32 (4 d)			3	3	3	-	-	3	-	-	-
			PD 56-58	PD 65 (7-9 d)			5	5	5	-	-	5	-	-	-
Sex-combined females (♀ ← ♂)	PD 14	N/A	PD 28	PD 35 (7 d)	N/A		7	5	5	-	-	4	4	-	-
	N/A						5	-	-	-	-	4	-	-	-
Adult-exposed males (♂ ← adult ♂ + ♀)	PD 14	N/A	PD 28	PD 35 (7 d)	N/A		5	3	6	3	3	5	-	-	-
Muscone-exposed females (♀ ← musc)	PD 14	PD 21-35	PD 28	PD 32 (4 d)	0.1		5	5	5	-	-	3	-	-	-
				PD 35 (7 d)	0.1		5	5	5	-	-	4	-	-	-
				PD 35 (7 d)	1		6	6	6	-	-	4	4	-	-
				PD 35 (7 d)	10		5	5	5	-	-	-	-	-	-
	N/A	PD 21-35	PD 28	PD 35 (7 d)	0.1		5	5	5	-	-	4	-	4	4
			PD 28	PD 32 (4 d)	0.1		4	4	4	-	-	4	-	-	-
		PD 21-65	PD 56-58	PD 65 (7-9 d)	0.1		7	5	7	-	-	6	-	-	-
Ambretone-exposed females (♀ ← amb)	N/A	PD 21-35	PD 28	PD 35 (7 d)	0.1		5	5	5	-	-	5	-	-	-
SBT-exposed females (♀ ← SBT)	N/A	PD 21-35	PD 28	PD 35 (7 d)	0.1		5	5	5	-	-	4	-	-	-
Isoamyl acetate-exposed females (♀ ← IAA)	N/A	PD 21-35	PD 28	PD 35 (7 d)	0.1		5	5	5	-	-	-	-	-	-
