# Supplementary material for: In mice, discrete odors can selectively promote the neurogenesis of sensory neuron subtypes that they stimulate
Source: eLife. 2025 Jun 18;13:RP96152. doi: 10.7554/eLife.96152 (PMC12176391; doi:10.7554/eLife.96152)
Supplement: Supplementary file 2. [file elife-96152-supp2.xlsx]

## Sheet: Sheet2
Target (gene)	OE expression zone	Purpose	Gene region targeted	Genomic position relative to CDS start	Forward primer	Reverse primer	Probe length (nt)
Olfr235 (Or5an11)	2	OSN quantification	5'-UTR	-7217	TCAACAGCATGTTCAGGGGA	GCCTTTTTCTCACCTGGGCT	673
Olfr1440 (Or5an6)	2	OSN quantification	CDS	363	GACCGGTATGCTGCCATTTGTA	TTGTACCCTTAGTGGTGACAT	494
Olfr1431 (Or5an9)	2	OSN quantification	3'-UTR	1540	ACTGGTGAGCAAGTCATGGT	CAGTGGCCATGCTTATCAATGT	547
Olfr1437 (Or5an1b)	3	OSN quantification	3'-UTR	1190	TTCAGCCCTTGGTCTTGTCC	CCTGACGGTGAGAAGTGTCC	753
Olfr1419 (Or10q3)	3	OSN quantification	CDS	33	TTCCACTTCCGCCCCTTTTC	ACTTCTTCTGCGACATGCCT	753
Olfr912 (Or8b48)	3	OSN quantification	CDS/3'-UTR	483	TGCATCCTGAGACTGACTTTCT	GCTGTGTCAAATGCAAGATTTTAAA	500
Olfr1463 (Or5b109)	2	OSN quantification	CDS	133	GGGTTGATTCTGCTGATTCTTT	GAGCAAAGAAGAGAGTGAAGCTG	502
Olfr827 (Or9k7)	3	OSN quantification	CDS/3'-UTR	1050	TCTTGTGCAAGCAAAAGGTT	TGAACTCAAAGCCTGCCTCT	605
Olfr1325 (Or13ae2)	3	OSN quantification	CDS/3'-UTR	921	GAGGGTAAATTGTGGGGTCA	CTAAGCAGCCGATTTGGAAG	589
S100a5	44930	UNO efficiency analysis	CDS	1	CTTCTTCCTTGGGTACATATCGTT	TGGAAGGATCCATCTGGGAGA	404
