# Supplementary material for: In mice, discrete odors can selectively promote the neurogenesis of sensory neuron subtypes that they stimulate
Source: eLife. 2025 Jun 18;13:RP96152. doi: 10.7554/eLife.96152 (PMC12176391; doi:10.7554/eLife.96152)
Supplement: Supplementary file 3. [file elife-96152-supp3.xlsx]

## Sheet: Sheet1 (3)
	quantities of comparison	Olfr235 (Or5an11)	Olfr1440 (Or5an6)	Olfr1431 (Or5an9)	Olfr1437 (Or5an1b)	Olfr912 (Or8b48)	Olfr1463 (Or5b109)	Olfr827 (Or9k7)	Olfr1325 (Or13ae2)	Olfr235 (Or5an11)	Olfr1440 (Or5an6)	Olfr1431 (Or5an9)	Olfr1437 (Or5an1b)	Olfr912 (Or8b48)	Olfr1463 (Or5b109)	Olfr827 (Or9k7)	Olfr1325 (Or13ae2)
Experimental condition		parametric tests								non-parametric tests								Corresponding figure(s)
UNO-treated mice	OSN quantities	Ratio paired t-test (2-tailed) [parametric]: P values								Wilcoxon matched-pairs signed rank test (2-tailed) [non-parametric]: P values
♂ ← ♂ (normalized to half-sections)	newborn OSNs	0.0009	0.0333	0.0059	0.8299	0.8737	0.8586			0.0156	0.0312	0.0078	>0.9999	0.7344	0.875			Fig 2; Fig 2-fig suppl 1; Fig 3; Fig 3-fig suppl 1, 3; Fig 6; Fig 6-fig suppl 1
♂ ← ♂ (normalized to EdU+ cells)	newborn OSNs	0.0014								0.0156								Fig 2-fig suppl 2
♂ ← ♂ (normalized to DAPI+ area)	newborn OSNs	0.0005								0.0156								Fig 2-fig suppl 2
♀ ← ♀	newborn OSNs	0.8388	0.0019	0.0017		0.7533	0.8388			0.875	0.007813	0.0156		0.875	>0.9999			Fig 3; Fig 3-fig suppl 1; Fig 4; Fig 4-fig suppl 1
♀ ← ♂	newborn OSNs	0.0029	0.0334	0.0032		0.8462	0.6391			0.0312	0.125	0.0625		0.75	0.875			Fig 3; Fig 3-fig suppl 1
♂ ← ♂	total OSNs	0.0048	<0.0001	<0.0001		<0.0001	0.8312			0.0156	0.0039	0.002		0.0039	0.875			Fig 3-fig suppl 1
♀ ← ♀	total OSNs	0.1562	0.0037	<0.0001		0.0026	0.19			0.1562	0.0078	0.0156		0.0625	0.125			Fig 3-fig suppl 1
♀ ← ♂	total OSNs	<0.0001	0.0005	0.0006		0.0007	0.6517			0.0156	0.0625	0.0625		0.125	>0.9999			Fig 3-fig suppl 1
♂ ← adult ♂ + ♀	newborn OSNs	0.0059	0.0304	0.0018	0.5354	0.178				0.0625	0.25	0.0312	0.75	0.5				Fig 3-fig suppl 3
♀ ← 0.1% muscone	newborn OSNs	0.0015	0.0327	0.0029		0.252				0.0625	0.125	0.0625		0.375				Fig 4; Fig 4-fig suppl 1
♀ ← 1% muscone	newborn OSNs	0.0053	0.0013	0.0002		0.277	0.3811			0.0312	0.0312	0.0312		0.375	0.625			Fig 4; Fig 4-fig suppl 1
♀ ← 10% muscone	newborn OSNs	0.466	0.0928	0.7792						0.4375	0.125	>0.9999						Fig 4; Fig 4-fig suppl 1
♀ ← 0.1% muscone	total OSNs	0.0069	0.735	0.0206		0.1242				0.0625	0.8125	0.0625		0.25				Fig 4-fig suppl 2
♀ ← 1% muscone	total OSNs	0.1364	0.1599	0.0177		0.0493	0.8605			0.1562	0.2188	0.0312		0.125	0.875			Fig 4-fig suppl 2
♀ ← 10% muscone	total OSNs	0.7464	0.9946	0.089						0.8125	>0.9999	0.0625						Fig 4-fig suppl 2
♂ ← ♂ (4 d post-EdU)	newborn OSNs	0.0051	0.0614	0.0006		0.5509	0.6517			0.125	0.125	0.125		>0.9999	0.75			Fig 6; Fig 6-fig suppl 1
♀ ← 0.1% muscone (4 d post-EdU)	newborn OSNs	0.0079				0.9123				0.0625				>0.9999				Fig 6; Fig 6-fig suppl 1
♀ ← ♀ (4 d post-EdU)	newborn OSNs	0.1974								N too small								Fig 6; Fig 6-fig suppl 1
UNO-treated mice	UNO effect sizes	One-way ANOVA test, FDR-adjusted using the 2-stage linear step-up procedure of Benjamini, Krieger and Yekutieli [parametric]: q values								Kruskal-Wallis test, FDR-adjusted using the 2-stage linear step-up procedure of Benjamini, Krieger and Yekutieli [non-parametric]: q values
♂ ← ♂ 1/2 sect vs EdU+ normalization	newborn OSNs	0.7505								0.6313								Fig 2-fig suppl 2
♂ ← ♂ 1/2 sect vs DAPI+ normalization	newborn OSNs	0.974								0.9959								Fig 2-fig suppl 2
♂ ← ♂ EdU+ vs DAPI+ normalization	newborn OSNs	0.7505								0.6313								Fig 2-fig suppl 2
♂ ← ♂ vs ♀ ← ♀	newborn OSNs	0.0248	0.9431	0.3743		>0.9999	0.9527			0.0671	0.7737	0.4117		0.9657	0.968			Fig 3; Fig 3-fig suppl 1
♂ ← ♂ vs ♀ ← ♂	newborn OSNs	0.3795	0.9431	0.3743		>0.9999	0.9527			0.4494	0.7737	0.4117		0.9657	0.968			Fig 3; Fig 3-fig suppl 1
♀ ← ♀ vs ♀ ← ♂	newborn OSNs	0.0422	0.9431	0.8438		>0.9999	0.9527			0.1941	0.999	0.8589		0.9657	0.968			Fig 3; Fig 3-fig suppl 1
♂ ← ♂ vs ♀ ← ♀	total OSNs	0.1168	0.5377	0.9036		0.4436	0.5813			0.2084	0.4542	0.6843		0.5333	0.5134			Fig 3; Fig 3-fig suppl 1
♂ ← ♂ vs ♀ ← ♂	total OSNs	0.6784	0.5377	0.9036		0.4436	0.9987			0.7537	0.4542	0.6843		0.4408	0.9678			Fig 3; Fig 3-fig suppl 1
♀ ← ♀ vs ♀ ← ♂	total OSNs	0.1379	0.5377	0.9036		0.6899	0.5813			0.2145	0.4419	0.6843		0.6284	0.5134			Fig 3; Fig 3-fig suppl 1
♀ ← 0% vs 0.1% musc	newborn OSNs	0.0149	>0.9999	0.2951		0.8544				0.0639	>0.9999	0.2008		0.7971				Fig 4; Fig 4-fig suppl 1
♀ ← 0% vs 1% musc	newborn OSNs	0.0149	>0.9999	0.0088		0.8544				0.102	>0.9999	0.0912		0.7971				Fig 4; Fig 4-fig suppl 1
♀ ← 0% vs 10% musc	newborn OSNs	0.2574	0.577	0.0007						>0.9999	>0.9999	0.0912						Fig 4; Fig 4-fig suppl 1
♀ ← 0% vs 0.1% musc	total OSNs	0.7723	0.0168	0.1211		0.1418				0.8653	0.0118	0.0721		0.2056				Fig 4-fig suppl 2
♀ ← 0% vs 1% musc	total OSNs	0.8674	0.0008	0.319		0.1418				0.8653	0.0013	0.1642		0.1442				Fig 4-fig suppl 2
♀ ← 0% vs 10% musc	total OSNs	0.7723	0.0256	0.1211						0.8653	0.0259	0.0721						Fig 4-fig suppl 2
UNO-treated mice	UNO effect sizes	Unpaired t-test (2-tailed) [parametric]: P values								Mann-Whitney test (2-tailed) [non-parametric]: P values
♂ ← Adult ♂+♀	newborn OSNs	0.7209	0.6269	0.0397	0.8484	0.7859				0.9091	0.8318	0.0206	0.8571	0.975				Fig 3-fig suppl 3
♀ ← 0% vs 1% musc	newborn OSNs						0.8539								0.6857			Fig 4-fig suppl 1
♀ ← 0% vs 1% musc	total OSNs						0.1488								0.0857			Fig 4-fig suppl 2
♂ ← ♂ 4 vs 7 d post-EdU	newborn OSNs	0.8613	0.6986	0.9055		0.8598	0.7528			0.8242	0.8545	0.5435		0.9399	0.8857			Fig 6; Fig 6-fig suppl 1
♀ ← 0.1% musc 4 vs 7 d post-EdU	newborn OSNs	0.761				0.3325				0.7937				0.5429				Fig 6; Fig 6-fig suppl 1
♀ ← ♀ 4 vs 7 d post-EdU	newborn OSNs	0.9467								>0.9999								Fig 6-fig suppl 1
non-occluded mice	OSN quantities	One-way ANOVA test, FDR-adjusted using the 2-stage linear step-up procedure of Benjamini, Krieger and Yekutieli [parametric]: q values								Kruskal-Wallis test, FDR-adjusted using the 2-stage linear step-up procedure of Benjamini, Krieger and Yekutieli [non-parametric]: q values
♂ ← ♂ vs ♀ ← ♀	newborn OSNs	0.0026				0.8227				0.0122				0.9678				Fig 3
♀ ← ♀ vs ♀ ← ♂	newborn OSNs	0.0003				0.8227				0.0023				0.8479				Fig 3
effect ♂/♀: 1/2 sect vs EdU+ normalization	newborn OSNs	0.9474								0.9544								Fig 3-fig suppl 2
effect ♂/♀: 1/2 sect vs DAPI+ normalization	newborn OSNs	0.9474								0.9544								Fig 3-fig suppl 2
effect ♂/♀: DAPI vs EdU+ normalization	newborn OSNs	0.9474								0.9544								Fig 3-fig suppl 2
♀ ← 0% vs 0.1% musc	newborn OSNs	<0.0001	0.0018	0.0026		0.9571				0.0017	0.0141	0.0661		0.8753				Fig 4; Fig 4-fig suppl 3
♀ ← 0% vs 0.1% amb	newborn OSNs	<0.0001	0.0006	0.0191		0.5647				0.0006	0.0051	0.0661		0.497				Fig 4; Fig 4-fig suppl 3
♀ ← 0% vs 0.1% SBT	newborn OSNs	0.3163	0.3192	0.3557		0.3661				0.2684	0.3163	0.5422		0.497				Fig 4; Fig 4-fig suppl 3
♀ ← 0% vs 0.1% IAA	newborn OSNs	0.4694	0.3412	0.3653						0.3884	0.3181	0.7395						Fig 4; Fig 4-fig suppl 3
effect musc exposure: 1/2 sect vs EdU+ norm	newborn OSNs	0.7238								0.6878								Fig 4-fig suppl 4
effect musc exposure: 1/2 sect vs DAPI+ norm	newborn OSNs	0.7238								0.7599								Fig 4-fig suppl 4
effect musc exposure: DAPI vs EdU+ norm	newborn OSNs	0.7238								0.6878								Fig 4-fig suppl 4
non-occluded mice	OSN quantities	Unpaired t-test (2-tailed) [parametric]: P values								Mann-Whitney test (2-tailed) [non-parametric]: P values
♀ ← ♀ vs ♂ ← ♂ (per half-section)	newborn OSNs	0.0037								0.0055								Fig 3-fig suppl 2
♀ ← ♀ vs ♂ ← ♂ (per EdU+ cells)	newborn OSNs	0.0144								0.0232								Fig 3-fig suppl 2
♀ ← ♀ vs ♂ ← ♂ (per sq mm DAPI+ area)	newborn OSNs	0.0054								0.0052								Fig 3-fig suppl 2
♀ ← ♀ vs ♀ ← musc (per half-section)	newborn OSNs	0.0002						0.646	0.7795	0.0013						0.8571	>0.9999	Fig 4-fig suppl 3; Fig 4-fig suppl 4
♀ ← ♀ vs ♀ ← musc (per EdU+ cells)	newborn OSNs	0.0002								0.001								Fig 4-fig suppl 4
♀ ← ♀ vs ♀ ← musc (per sq mm DAPI+ area)	newborn OSNs	0.0009								0.0047								Fig 4-fig suppl 4
♀ ← 0% vs 0.1% musc (adult)	newborn OSNs	0.1239	0.0316	0.0789		0.7821				0.0732	0.0476	0.1604		0.7922				Fig 5
non-occluded mice	OSN quantities	Two-way ANOVA test (factors: muscone exposure, days post-EdU): P values
factor: 0 or 0.1% muscone exposure	newborn OSNs	<0.0001	<0.0001	0.003094		0.5898												Fig 6; Fig 6-fig suppl 1
factor: 4 or 7 d post-EdU	newborn OSNs	0.2006	0.1117	0.4222		0.1196												Fig 6; Fig 6-fig suppl 1
interaction: muscone exposure, days post-EdU	newborn OSNs	1	1	0.2007		0.3558												Fig 6; Fig 6-fig suppl 1
